# Supplementary material for: Planimetric and Volumetric Brainstem MRI Markers in Progressive Supranuclear Palsy, Multiple System Atrophy, and Corticobasal Syndrome. A Systematic Review and Meta-Analysis
Source: MDPI journal article supplement (doi:10.3390/neurolint16010001), 2023-12-19
Supplement: s1 [file s1]

**Supplementary Table 1.** Analytical presentation of study characteristics regarding the signaling questions, risk of bias and concerns regarding applicability for patient selection, Index Test, Reference Standard and Flow/Timing, based on the QUADAS Tool; ROB: Risk of Bias; App: Concerns regarding applicability; : low; : high; ?: unclear.

|    |                      | Patient Selection           |                          |     |     | Index Test            |     |     | Reference Standard       |                     |     |     | Flow and Timing |             |                       |     |
|----|----------------------|-----------------------------|--------------------------|-----|-----|-----------------------|-----|-----|--------------------------|---------------------|-----|-----|-----------------|-------------|-----------------------|-----|
|    |                      | Consecutive / random sample | Innapropriate exclusions | ROB | App | Test assessed blindly | ROB | App | RS classify participants | RS assessed blindly | ROB | App | All patients RS | All same RS | All patients included | ROB |
| 1  | Oba, 2005            | ?                           | 😊                        | ?   | 😊   | ?                     | ?   | 😊   | 😊                        | ?                   | 😊   | 😊   | 😊               | 😊           | 😊                     | 😊   |
| 2  | Groschel, 2006       | 😊                           | 😊                        | 😊   | 😊   | ?                     | 😊   | 😊   | 😊                        | ?                   | 😊   | 😊   | 😊               | 😊           | 😊                     | 😊   |
| 3  | Paviour, 2006        | ?                           | 😊                        | ?   | 😊   | ?                     | ?   | 😊   | 😊                        | ?                   | 😊   | 😊   | 😊               | 😊           | 😊                     | 😊   |
| 4  | Cosottini, 2007      | ?                           | 😊                        | ?   | 😊   | ?                     | ?   | 😊   | 😊                        | ?                   | 😊   | 😊   | 😊               | 😊           | 😊                     | 😊   |
| 5  | Borroni, 2010        | 😞                           | 😞                        | 😞   | 😊   | ?                     | ?   | 😊   | 😊                        | ?                   | 😊   | 😊   | 😊               | 😊           | 😊                     | 😊   |
| 6  | Longoni, 2010        | ?                           | 😊                        | ?   | 😊   | 😊                     | 😊   | 😊   | 😊                        | 😊                   | 😊   | 😊   | 😊               | 😊           | 😊                     | 😊   |
| 7  | Looi, 2011           | ?                           | 😊                        | ?   | 😊   | 😊                     | 😊   | 😊   | 😊                        | ?                   | 😊   | 😊   | 😊               | 😊           | ?                     | 😊   |
| 8  | Morelli, 2011        | ?                           | 😊                        | ?   | 😊   | 😊                     | 😊   | 😊   | 😊                        | ?                   | 😊   | 😊   | 😊               | 😊           | 😊                     | 😊   |
| 9  | Morelli, 2014        | ?                           | 😊                        | ?   | 😊   | 😊                     | 😊   | 😊   | 😊                        | ?                   | 😊   | 😊   | 😊               | 😊           | ?                     | 😊   |
| 10 | Huppertz, 2016       | ?                           | 😊                        | ?   | 😊   | ?                     | ?   | 😊   | 😊                        | ?                   | 😊   | 😊   | 😊               | 😊           | 😊                     | 😊   |
| 11 | Magnesi, 2016        | ?                           | 😊                        | ?   | 😊   | 😊                     | 😊   | 😊   | 😊                        | ?                   | 😊   | 😊   | 😊               | 😊           | ?                     | 😊   |
| 12 | Pasha, 2016          | 😊                           | 😞                        | 😞   | 😊   | ?                     | ?   | 😊   | 😊                        | ?                   | 😊   | 😊   | 😊               | 😊           | 😊                     | 😊   |
| 13 | Sankhla, 2016        | ?                           | 😊                        | ?   | 😊   | 😊                     | 😊   | 😊   | 😊                        | ?                   | 😊   | 😊   | 😊               | 😊           | 😊                     | 😊   |
| 14 | Nigro, 2017a         | ?                           | 😊                        | ?   | 😊   | 😊                     | 😊   | 😊   | 😊                        | ?                   | 😊   | 😊   | 😊               | 😊           | 😊                     | 😊   |
| 15 | Nigro, 2017b         | ?                           | 😊                        | ?   | 😊   | 😊                     | 😊   | 😊   | 😊                        | ?                   | 😊   | 😊   | 😊               | 😊           | 😊                     | 😊   |
| 16 | Nizamani, 2017       | 😊                           | 😊                        | 😊   | 😊   | 😊                     | 😊   | 😊   | 😊                        | ?                   | 😊   | 😊   | 😊               | 😊           | 😊                     | 😊   |
| 17 | Sisby, 2017          | ?                           | 😊                        | ?   | 😊   | 😊                     | 😊   | 😊   | 😊                        | ?                   | 😊   | 😊   | 😊               | 😊           | 😊                     | 😊   |
| 18 | Quattrone, 2018      | 😊                           | 😊                        | 😊   | 😊   | 😊                     | 😊   | 😊   | 😊                        | 😊                   | 😊   | 😊   | 😊               | 😊           | 😊                     | 😊   |
| 19 | Ahn, 2019            | ?                           | 😊                        | ?   | 😊   | 😊                     | 😊   | 😊   | 😊                        | ?                   | 😊   | 😊   | 😊               | 😊           | 😊                     | 😊   |
| 20 | Krismer, 2019        | ?                           | 😊                        | ?   | 😊   | 😊                     | 😊   | 😊   | 😊                        | 😊                   | 😊   | 😊   | 😊               | 😊           | 😊                     | 😊   |
| 21 | Quattrone, 2019      | 😊                           | 😊                        | 😊   | 😊   | 😊                     | 😊   | 😊   | 😊                        | ?                   | 😊   | 😊   | 😊               | 😊           | 😊                     | 😊   |
| 22 | Constantinides, 2019 | 😊                           | 😊                        | 😊   | 😊   | ?                     | ?   | 😊   | 😊                        | ?                   | 😊   | 😊   | 😊               | 😊           | 😊                     | 😊   |
| 23 | Jabbari, 2020        | ?                           | 😊                        | ?   | 😊   | 😊                     | 😊   | 😊   | 😊                        | ?                   | 😊   | 😊   | 😊               | 😊           | 😊                     | 😊   |
| 24 | Nigro, 2020          | ?                           | 😊                        | ?   | 😊   | 😊                     | 😊   | 😊   | 😊                        | ?                   | 😊   | 😊   | 😊               | 😊           | 😊                     | 😊   |
| 25 | Madetko, 2022        | ?                           | 😊                        | ?   | 😊   | ?                     | ?   | 😊   | 😊                        | ?                   | 😊   | 😊   | 😊               | 😊           | ?                     | 😊   |

|   |                  |   |   |   |   |   |   |   |   |   |   |   |   |   |   |   |
|---|------------------|---|---|---|---|---|---|---|---|---|---|---|---|---|---|---|
| 2 | Virahammar, 2022 | ? | 😊 | ? | 😊 | 😊 | 😊 | 😊 | 😊 | ? | 😊 | 😊 | 😊 | 😊 | 😊 | 😊 |
| 2 | Quattrone, 2023  | 😊 | 😊 | 😊 | 😊 | 😊 | 😊 | 😊 | 😊 | ? | 😊 | 😊 | 😊 | 😊 | 😊 | 😊 |

**Supplementary Table 2.** Analytical data regarding the number of patients per study group, mean values and standard deviations of all available MRI markers in studies of Richardson patients included in the meta-analysis.

| Study number | Study ID                  | Richardson's Syndrome |               |              |              |            |           |                 |             | Controls |               |              |              |            |            |                 |             |
|--------------|---------------------------|-----------------------|---------------|--------------|--------------|------------|-----------|-----------------|-------------|----------|---------------|--------------|--------------|------------|------------|-----------------|-------------|
|              |                           | N                     | midbrain area | pons area    | M/P area     | MRPI 1     | MRPI 2    | midbrain volume | pons volume | N        | midbrain area | pons area    | M/P area     | MRPI 1     | MRPI 2     | midbrain volume | pons volume |
| 1.           | Oba, 2005                 | 21                    | 56 (7.6)      | 448.6 (52.1) | 0.12 (0.02)  |            |           |                 |             | 31       | 117.7 (14.7)  | 570 (42.7)   | 0.24 (0.03)  |            |            |                 |             |
| 2.           | Groschel, 2006            | 33                    | 81.1 (13.6)   |              |              |            |           |                 |             | 22       | 138.1 (25.6)  |              |              |            |            |                 |             |
| 3.           | Paviour, 2006             | 18                    |               |              |              |            |           | 5.7 (1.1)       | 12.8 (1.6)  | 18       |               |              |              |            |            | 8.3 (0.8)       | 13.9 (1.5)  |
| 4.           | Cosottini, 2007           | 15                    | 90 (17)       | 507 (56)     | 0.18 (0.04)  |            |           | 4.0 (0.7)       |             | 14       | 155 (15)      | 570 (45)     | 0.28 (0.04)  |            |            | 5.9 (1.7)       |             |
| 5.           | Borroni, 2010             | 18                    |               |              | 0.19 (0.03)  |            |           |                 |             | 25       |               |              | 0.255 (0.03) |            |            |                 |             |
| 6.           | Longoni, 2011             | 10                    | 71 (27)       | 512 (94)     | 0.129        | 20.7 (7.1) |           |                 |             | 24       | 130.5 (30.5)  | 537.8 (61.1) |              | 0.233      | 10.5 (2.4) |                 |             |
| 7.           | Looi, 2011                | 15                    | 93.8 (20.1)   | 526 (62)     | 0.178        |            |           |                 |             | 15       | 145.3 (20.1)  | 577.4 (61.6) | 0.252        |            |            |                 |             |
| 8.           | Morelli, 2011             | 42                    | 64 (13.9)     | 417 (57)     | 0.15 (0.03)  | 21.4 (7.4) |           |                 |             | 38       | 122 (17.3)    | 473 (47.3)   | 0.26 (0.04)  | 9.4 (1.8)  |            |                 |             |
| 9.           | Morelli, 2014             | 25                    | 77.3 (14.6)   | 472 (58)     | 0.163 (0.02) | 18.9 (4.4) |           |                 |             | 81       | 142.4 (21.2)  | 528.8 (51.6) | 0.27 (0.04)  | 9.2 (1.6)  |            |                 |             |
| 10.          | Huppertz, 2016            | 106                   | 136.1 (22.5)  | 450 (59)     |              |            |           | 8.9 (0.9)       | 13.9 (1.6)  | 73       | 170 (11.3)    | 511.6 (45.2) |              |            |            | 10.5 (0.6)      | 15.8 (1.4)  |
| 11.          | Pasha, 2016               | 17                    | 81.1 (23.6)   | 499 (59)     |              |            |           |                 |             | 30       | 146.1 (15.6)  | 504.9 (53.5) |              |            |            |                 |             |
| 12.          | Sankhla, 2016             | 26                    | 71.9 (16.5)   | 461 (61)     | 0.16 (0.03)  | 23.5 (9.6) |           |                 |             | 30       | 135.6 (21.7)  | 495.5 (37.7) | 0.27 (0.04)  | 9.5 (1.9)  |            |                 |             |
| 13.          | Nigro, 2017a (1/2 - 1.5T) | 44                    | 74 (15)       | 465 (53)     |              | 18.3 (5.3) |           |                 |             | 19       | 127 (19)      | 500 (43)     |              | 10.1 (1.1) |            |                 |             |
|              | Nigro, 2017a (2/2 - 3T)   | 37                    | 72 (14)       | 459 (58)     |              | 20.6 (5.6) |           |                 |             | 92       | 134 (18)      | 526 (55)     |              | 9.5 (1.4)  |            |                 |             |
| 14.          | Nigro, 2017b              | 15                    | 62 (13)       | 465 (70)     | 0.13 (0.02)  | 27.0 (5.8) |           |                 |             | 86       | 138 (18)      | 524 (53)     | 0.26 (0.03)  | 9.3 (1.5)  |            |                 |             |
| 15.          | Nizamani, 2017            | 34                    | 96 (13.5)     | 431 (49)     |              |            |           |                 |             | 34       | 149.4 (12.5)  | 457.6 (38.1) |              |            |            |                 |             |
| 16.          | Silsby, 2017              | 16                    | 88.3 (22)     | 486 (52)     | 0.18 (0.04)  | 17.6 (4.1) |           |                 |             | 22       | 152.6 (16.3)  | 523.8 (45.2) | 0.29 (0.03)  | 10.3 (2.0) |            |                 |             |
| 17.          | Quattrone, 2018           | 46                    |               |              |              | 20.4 (4.7) | 5.2 (1.7) |                 |             | 53       |               |              |              | 9.1 (1.3)  | 1.5 (0.4)  |                 |             |
| 18.          | Ahn, 2019                 | 27                    | 87 (15.8)     | 507 (39)     | 0.17 (0.04)  |            |           |                 |             | 27       | 129 (18)      | 517 (54)     | 0.25 (0.02)  |            |            |                 |             |
| 19.          | Quattrone, 2019           | 48                    | 73.9 (16.2)   |              |              |            |           |                 |             | 38       | 137.5 (16.4)  |              |              |            |            |                 |             |
| 20.          | Constantinides, 2019      | 43                    | 90 (23)       |              | 0.18 (0.04)  | 22.5 (9.0) |           |                 |             | 29       | 141.5 (25.9)  |              | 0.27 (0.02)  | 12.5 (4.0) |            |                 |             |
| 21.          | Jabbari, 2020             | 25                    |               |              |              |            |           | 5.0 (0.5)       |             | 35       |               |              |              |            |            | 6.0 (0.5)       |             |
| 22.          | Nigro, 2020               | 108                   | 70 (16)       | 465 (54)     |              | 20.1 (5.6) |           |                 |             | 139      | 128 (20)      | 497 (49)     |              | 9.6 (2.0)  |            |                 |             |
| 23.          | Madetko, 2022             | 19                    | 76 (32)       | 477 (39)     | 0.16 (0.05)  | 19.4 (6.9) | 5.6 (2.3) |                 |             | 16       | 121 (23)      | 496 (73)     | 0.25 (0.03)  | 11.2 (1.8) | 2.3 (0.6)  |                 |             |
| 24.          | Virhammar, 2021           | 29                    | 80.7 (6.7)    |              |              |            |           |                 |             | 38       | 133.6 (33.6)  |              |              |            |            |                 |             |
| 25.          | Quattrone, 2023           | 62                    |               |              |              | 20.2 (5.0) | 5.1 (1.9) |                 |             |          |               |              |              | 9.4 (1.3)  | 1.4 (0.5)  |                 |             |

**Supplementary Table 3.** Analytical data regarding the number of patients per study group, mean values and standard deviations of all available MRI markers in studies of MSA-P patients included in the meta-analysis.

| Study number | Study ID       | MSA-P |                 |                 |                |               |              |                 |               | Controls |                 |                 |                |               |              |                 |               |
|--------------|----------------|-------|-----------------|-----------------|----------------|---------------|--------------|-----------------|---------------|----------|-----------------|-----------------|----------------|---------------|--------------|-----------------|---------------|
|              |                | N     | midbrain area   | pons area       | M/P area       | MRPI 1        | MRPI 2       | midbrain volume | pons volume   | N        | midbrain area   | pons area       | M/P area       | MRPI 1        | MRPI 2       | midbrain volume | pons volume   |
| 1.           | Oba, 2005      | 25    | 97.2<br>(17.0)  | 381.6<br>(97.0) | 0.27<br>(0.07) |               |              |                 |               | 31       | 117.7<br>(14.7) | 570<br>(42.7)   | 0.24<br>(0.03) |               |              |                 |               |
| 2.           | Huppertz, 2016 | 60    | 153.8<br>(15.3) | 440.3<br>(90.7) |                |               |              | 9.8<br>(0.7)    | 13.4<br>(2.7) | 73       | 170<br>(11.3)   | 511.6<br>(45.2) |                |               |              | 10.5<br>(0.6)   | 15.8<br>(1.4) |
| 3.           | Magnesi, 2016  | 20    | 111.0<br>(17.4) | 451.5<br>(88.6) | 0.26<br>(0.07) | 10.3<br>(3.6) |              |                 |               | 29       | 119.1<br>(12.5) | 535.1<br>(32.8) | 0.22<br>(0.02) | 13.1<br>(2.0) |              |                 |               |
| 4.           | Krismer, 2019  | 18    |                 |                 |                |               |              | 4.0<br>(0.4)    | 9.0<br>(1.7)  | 26       |                 |                 |                |               |              | 3.9<br>(0.3)    | 9.7<br>(0.8)  |
| 5.           | Madetko, 2022  | 21    | 108<br>(19)     | 459<br>(65)     | 0.24<br>(0.05) | 10.8<br>(2.5) | 2.6<br>(0.9) |                 |               | 16       | 121<br>(23)     | 496<br>(73)     | 0.25<br>(0.03) | 11.2<br>(1.8) | 2.3<br>(0.6) |                 |               |

**Supplementary Table 4.** Analytical data regarding the number of patients per study group, mean values and standard deviations of all available MRI markers in studies of corticobasal syndrome patients included in the meta-analysis.

| Study number | Study ID       | Corticobasal syndrome |                 |             |                |               |              |                 |               | Controls |                 |             |                 |               |              |                 |             |
|--------------|----------------|-----------------------|-----------------|-------------|----------------|---------------|--------------|-----------------|---------------|----------|-----------------|-------------|-----------------|---------------|--------------|-----------------|-------------|
|              |                | N                     | midbrain area   | pons area   | M/P area       | MRPI 1        | MRPI 2       | midbrain volume | pons volume   | N        | midbrain area   | pons area   | M/P area        | MRPI 1        | MRPI 2       | midbrain volume | pons volume |
| 1.           | Groschel, 2006 | 18                    | 128.7<br>(17.4) |             |                |               |              |                 |               | 22       | 138.1<br>(25.6) |             |                 |               |              |                 |             |
| 2.           | Borroni, 2010  | 16                    |                 |             | 0.23<br>(0.03) |               |              |                 |               | 25       |                 |             | 0.255<br>(0.03) |               |              |                 |             |
| 3.           | Jabbari, 2020  | 17                    |                 |             |                |               |              | 5.5<br>(0.5)    | 14.1<br>(1.7) | 139      | 128<br>(20)     | 497<br>(49) |                 | 9.6<br>(2.0)  |              |                 |             |
| 4.           | Madetko, 2022  | 19                    | 81<br>(22)      | 444<br>(61) | 0.18<br>(0.05) | 15.4<br>(5.0) | 4.2<br>(1.7) |                 |               | 16       | 121<br>(23)     | 496<br>(73) | 0.25<br>(0.03)  | 11.2<br>(1.8) | 2.3<br>(0.6) |                 |             |
